# Supplementary material for: Diagnostic Validity of Drinking Behaviour for Identifying Alcohol Use Disorder: Findings from a Nationally Representative Sample of Community Adults and an Inpatient Clinical Sample
Source: bioRxiv or medRxiv preprint supplement (doi:10.1101/2024.09.14.24313683), 2024-09-16
Supplement: Supplementary file [file media-1.zip]

# Clinical Sample Crosstabulations

Drinking Days

Full Sample

|        |          | Predicted |          |
|--------|----------|-----------|----------|
|        |          | Positive  | Negative |
| Actual | Positive | 855       | 250      |
|        | Negative | 41        | 195      |

Female Sample

|        |          | Predicted |          |
|--------|----------|-----------|----------|
|        |          | Positive  | Negative |
| Actual | Positive | 283.87    | 90.13    |
|        | Negative | 7         | 49       |

Male Sample

|        |          | Predicted |          |
|--------|----------|-----------|----------|
|        |          | Positive  | Negative |
| Actual | Positive | 571.64    | 159.36   |
|        | Negative | 34.02     | 145.98   |

Drinks per Drinking Day

Full Sample

|        |          | Predicted |          |
|--------|----------|-----------|----------|
|        |          | Positive  | Negative |
| Actual | Positive | 948.09    | 156.91   |
|        | Negative | 42.01     | 193.99   |

Female Sample

|        |          | Predicted |          |
|--------|----------|-----------|----------|
|        |          | Positive  | Negative |
| Actual | Positive | 309       | 65       |
|        | Negative | 11        | 45       |

Male Sample

|        |          | Predicted |          |
|--------|----------|-----------|----------|
|        |          | Positive  | Negative |
| Actual | Positive | 639       | 92       |
|        | Negative | 31        | 149      |

Heavy Drinking Days

Full Sample

|        |          | Predicted |          |
|--------|----------|-----------|----------|
|        |          | Positive  | Negative |
| Actual | Positive | 930       | 175      |
|        | Negative | 32        | 204      |

Female Sample

|        |          | Predicted |          |
|--------|----------|-----------|----------|
|        |          | Positive  | Negative |
| Actual | Positive | 338.10    | 35.90    |
|        | Negative | 10.98     | 45.02    |

Male Sample

|        |          | Predicted |          |
|--------|----------|-----------|----------|
|        |          | Positive  | Negative |
| Actual | Positive | 621.35    | 109.65   |
|        | Negative | 23.04     | 156.96   |

Binned Alcohol Use Frequency

Full Sample

|        |          | Predicted |          |
|--------|----------|-----------|----------|
|        |          | Positive  | Negative |
| Actual | Positive | 981.24    | 123.76   |
|        | Negative | 43.90     | 192.10   |

Female Sample

|        |          | Predicted |          |
|--------|----------|-----------|----------|
|        |          | Positive  | Negative |
| Actual | Positive | 326.88    | 47.12    |
|        | Negative | 5.99      | 50.01    |

Male Sample

|        |          | Predicted |          |
|--------|----------|-----------|----------|
|        |          | Positive  | Negative |
| Actual | Positive | 654.25    | 76.76    |
|        | Negative | 37.98     | 142.02   |

# Community Sample Crosstabulations

Number of drinking days

Full Sample

|        |          | Predicted |           |
|--------|----------|-----------|-----------|
|        |          | Positive  | Negative  |
| Actual | Positive | 4,150.98  | 980.02    |
|        | Negative | 8,147.67  | 12,479.34 |

N missing = 20

Female Sample

|        |          | Predicted |          |
|--------|----------|-----------|----------|
|        |          | Positive  | Negative |
| Actual | Positive | 1,654.41  | 519.59   |
|        | Negative | 3,768.05  | 7,825.95 |

N missing = 11

Male Sample

|        |          | Predicted |          |
|--------|----------|-----------|----------|
|        |          | Positive  | Negative |
| Actual | Positive | 2167.48   | 3215.75  |
|        | Negative | 789.52    | 5817.25  |

N missing = 9

Number of drinks per drinking day

Full Sample

|        |          | Predicted |           |
|--------|----------|-----------|-----------|
|        |          | Positive  | Negative  |
| Actual | Positive | 3,942.14  | 1,190.86  |
|        | Negative | 5,821.89  | 14,823.11 |

Female Sample

|        |          | Predicted |          |
|--------|----------|-----------|----------|
|        |          | Positive  | Negative |
| Actual | Positive | 1,515.98  | 659.03   |
|        | Negative | 2,425.24  | 9,178.76 |

Male Sample

|        |          | Predicted |          |
|--------|----------|-----------|----------|
|        |          | Positive  | Negative |
| Actual | Positive | 2,425.56  | 3,408.46 |
|        | Negative | 532.44    | 5,632.54 |



Largest number of drinks per drinking day

Full Sample

|        |          | Predicted |           |
|--------|----------|-----------|-----------|
|        |          | Positive  | Negative  |
| Actual | Positive | 4,321.99  | 811.01    |
|        | Negative | 5,863.18  | 14,781.82 |

Female Sample

|        |          | Predicted |          |
|--------|----------|-----------|----------|
|        |          | Positive  | Negative |
| Actual | Positive | 1,911.83  | 263.18   |
|        | Negative | 3,550.82  | 8,053.18 |

Male Sample

|        |          | Predicted |          |
|--------|----------|-----------|----------|
|        |          | Positive  | Negative |
| Actual | Positive | 2,505.43  | 2,902.16 |
|        | Negative | 452.57    | 6,138.84 |

Frequency of 5+ drinks in one day

Full Sample

|        |          | Predicted |           |
|--------|----------|-----------|-----------|
|        |          | Positive  | Negative  |
| Actual | Positive | 3,957.46  | 1,155.54  |
|        | Negative | 4,323.48  | 16,264.52 |

N missing = 77

Female Sample

|        |          | Predicted |          |
|--------|----------|-----------|----------|
|        |          | Positive  | Negative |
| Actual | Positive | 1,648.97  | 515.03   |
|        | Negative | 2,200.39  | 9,380.61 |

N missing = 34

Male Sample

|        |          | Predicted |          |
|--------|----------|-----------|----------|
|        |          | Positive  | Negative |
| Actual | Positive | 2,323.81  | 625.19   |
|        | Negative | 2,152.67  | 6,854.33 |

N missing = 43

Frequency of 8+ drinks in one day

Full Sample

|        |          | Predicted |           |
|--------|----------|-----------|-----------|
|        |          | Positive  | Negative  |
| Actual | Positive | 2,986.84  | 2,110.16  |
|        | Negative | 2,184.98  | 18,428.02 |

N missing = 68

Female Sample

|        |          | Predicted |           |
|--------|----------|-----------|-----------|
|        |          | Positive  | Negative  |
| Actual | Positive | 947.36    | 1,210.64  |
|        | Negative | 568.06    | 11,024.94 |

N missing = 28

Male Sample

|        |          | Predicted |          |
|--------|----------|-----------|----------|
|        |          | Positive  | Negative |
| Actual | Positive | 2,039.67  | 899.33   |
|        | Negative | 1,623.60  | 7,396.40 |

N missing = 40

Frequency of 12+ drinks in one day

Full Sample

|        |          | Predicted |           |
|--------|----------|-----------|-----------|
|        |          | Positive  | Negative  |
| Actual | Positive | 1,865.52  | 3,245.49  |
|        | Negative | 948.57    | 19,672.43 |

N missing = 46

Female Sample

|        |          | Predicted |           |
|--------|----------|-----------|-----------|
|        |          | Positive  | Negative  |
| Actual | Positive | 454.86    | 1,711.14  |
|        | Negative | 185.55    | 11,411.45 |

N missing = 16

Male Sample

|        |          | Predicted |          |
|--------|----------|-----------|----------|
|        |          | Positive  | Negative |
| Actual | Positive | 1,407.71  | 1,537.29 |
|        | Negative | 776.06    | 8,247.94 |

N missing = 30

Frequency of 5+ drinks in<2 hours

Full Sample

|        |          | Predicted |           |
|--------|----------|-----------|-----------|
|        |          | Positive  | Negative  |
| Actual | Positive | 2,538.50  | 2,538.50  |
|        | Negative | 1,891.80  | 18,671.20 |

N missing = 138

Female Sample

|        |          | Predicted |           |
|--------|----------|-----------|-----------|
|        |          | Positive  | Negative  |
| Actual | Positive | 849.65    | 1,301.36  |
|        | Negative | 601.54    | 10,966.46 |

N missing = 60

Male Sample

|        |          | Predicted |          |
|--------|----------|-----------|----------|
|        |          | Positive  | Negative |
| Actual | Positive | 1,688.30  | 1,237.70 |
|        | Negative | 1,295.28  | 7,699.72 |

N missing = 78

Frequency of> DLRG

Full Sample

|        |          | Predicted |           |
|--------|----------|-----------|-----------|
|        |          | Positive  | Negative  |
| Actual | Positive | 4,150.44  | 973.56    |
|        | Negative | 4,821.10  | 15,781.90 |

N missing = 51

Female Sample

|        |          | Predicted |          |
|--------|----------|-----------|----------|
|        |          | Positive  | Negative |
| Actual | Positive | 1,867.51  | 301.49   |
|        | Negative | 3,220.91  | 8,365.09 |

N missing = 24

Male Sample

|        |          | Predicted |          |
|--------|----------|-----------|----------|
|        |          | Positive  | Negative |
| Actual | Positive | 2,452.65  | 502.35   |
|        | Negative | 2,461.64  | 6,555.36 |

N missing = 27
